# Supplementary material
Source: PubMed Central journal article supplement (PMC6999338)
Supplement: ELSC-18-447-s001.pdf [file ELSC-18-447-s001.pdf]

## Supporting information 1 Chemical composition of Ferrosorp DGμ. n.d.=not detected

| Methods:            |                                      |                                                                                                                                                                 |
|---------------------|--------------------------------------|-----------------------------------------------------------------------------------------------------------------------------------------------------------------|
| Water content       | 0.13%                                | DIN EN 14774-1 (2010): Solid biofuels - Determination of moisture content - Oven dry method - Part 1: Total moisture - Reference method.                        |
| Elementary analysis | [% <sub>TS</sub> ]                   | DIN EN 15104 (2011): Solid biofuels - Determination of total content of carbon, hydrogen and nitrogen - Instrumental methods.                                   |
| Carbon              | 4.21                                 |                                                                                                                                                                 |
| Sulfur              | 0.77                                 |                                                                                                                                                                 |
| Nitrogen            | 0.23                                 |                                                                                                                                                                 |
| Hydrogen            | 0.29                                 |                                                                                                                                                                 |
| Elements            | [mg kg <sub>TS</sub> <sup>-1</sup> ] | DIN EN 16170 (2012): Sludge, treated biowaste and soil - Determination of trace elements by inductively coupled plasma optical emission spectrometry (ICP-OES). |
| Aluminum            | Al                                   | 5,940.00                                                                                                                                                        |
| Barium              | Ba                                   | 49.20                                                                                                                                                           |
| Lead                | Pb                                   | 5.20                                                                                                                                                            |
| Cadmium             | Cd                                   | n.d.                                                                                                                                                            |
| Calcium             | Ca                                   | 118,000.00                                                                                                                                                      |
| Chrome              | Cr                                   | 7.76                                                                                                                                                            |
| Cobalt              | Co                                   | 53.50                                                                                                                                                           |
| Iron                | Fe                                   | 334,000.00                                                                                                                                                      |
| Potassium           | K                                    | n.d.                                                                                                                                                            |
| Copper              | Cu                                   | 7.02                                                                                                                                                            |
| Lithium             | Li                                   | 2.21                                                                                                                                                            |
| Magnesium           | Mg                                   | 8,410.00                                                                                                                                                        |
| Manganese           | Mn                                   | 4,750.00                                                                                                                                                        |
| Molybdum            | Mo                                   | n.d.                                                                                                                                                            |
| Sodium              | Na                                   | 390.00                                                                                                                                                          |

|            |    |           |
|------------|----|-----------|
| Nickel     | Ni | 80.60     |
| Phosphorus | P  | 245.00    |
| Sulfur     | S  | 18,800.00 |
| Strontium  | Sr | 707.00    |
| Thallium   | Tl | n.d.      |
| Titanium   | Ti | 241.00    |
| Tungsten   | W  | n.d.      |
| Zinc       | Zn | 253.00    |

| Elements |    | [mg kg <sub>TS</sub> <sup>-1</sup> ] | DIN EN ISO 11969 (1996): Water quality - Determination of arsenic - Atomic absorption spectrometric method (hydride technique). |
|----------|----|--------------------------------------|---------------------------------------------------------------------------------------------------------------------------------|
| Arsenic  | As | 59.800                               |                                                                                                                                 |
| Bismuth  | Bi | n.d.                                 |                                                                                                                                 |
| Mercury  | Hg | 0.077                                |                                                                                                                                 |
| Selenium | Se | 0.130                                |                                                                                                                                 |

**Supporting information 2** Overview of impurities of synthesized Fe(OH)<sub>3</sub> and Mn(OH)<sub>2</sub>. n.d. = not detected.

| Anions (DIN EN 12457-4)                                    | Impurities in Fe(OH) <sub>3</sub><br>(mg kg <sub>TS</sub> <sup>-1</sup> ) | Impurities in Mn(OH) <sub>2</sub><br>(mg kg <sub>TS</sub> <sup>-1</sup> ) |
|------------------------------------------------------------|---------------------------------------------------------------------------|---------------------------------------------------------------------------|
| Br <sup>-</sup>                                            | 0.05                                                                      | 57.7                                                                      |
| Cl <sup>-</sup>                                            | 1,720                                                                     | 30,800                                                                    |
| NO <sub>3</sub> <sup>-</sup>                               | 25.9                                                                      | 5.58                                                                      |
| NO <sub>2</sub> <sup>-</sup>                               | 1.44                                                                      | 1.65                                                                      |
| PO <sub>4</sub> <sup>3-</sup>                              | 0.058                                                                     | 0.18                                                                      |
| SO <sub>4</sub> <sup>2-</sup>                              | 21.9                                                                      | 1.93                                                                      |
| <b>Elements (DIN EN 16170)</b>                             |                                                                           |                                                                           |
| Al                                                         | 327                                                                       | n.d.                                                                      |
| Ba                                                         | 15.2                                                                      | 10.2                                                                      |
| Pb                                                         | 21.3                                                                      | 8.42                                                                      |
| Ca                                                         | 635                                                                       | 252                                                                       |
| Cr                                                         | 157                                                                       | n.d.                                                                      |
| Co                                                         | 78.8                                                                      | 2.5                                                                       |
| Fe                                                         | –                                                                         | 32.6                                                                      |
| K                                                          | 45,600                                                                    | 13,300                                                                    |
| Cu                                                         | 7.87                                                                      | n.d.                                                                      |
| Li                                                         | n.d.                                                                      | n.d.                                                                      |
| Mn                                                         | 241                                                                       | –                                                                         |
| Mo                                                         | n.d.                                                                      | 3.18                                                                      |
| Na                                                         | 640                                                                       | 172                                                                       |
| Ni                                                         | 141                                                                       | n.d.                                                                      |
| P                                                          | n.d.                                                                      | n.d.                                                                      |
| S                                                          | 43.7                                                                      | 2,270                                                                     |
| Si                                                         | n.d.                                                                      | n.d.                                                                      |
| Sr                                                         | 22.7                                                                      | 9.91                                                                      |
| W                                                          | n.d.                                                                      | n.d.                                                                      |
| Zn                                                         | 19.9                                                                      | 13.3                                                                      |
| Sum of the impurities (mg kg <sub>TS</sub> <sup>-1</sup> ) | 50,719.76                                                                 | 46,973.75                                                                 |
| Percentage of the total weight (%)                         | 5.07                                                                      | 4.70                                                                      |

**Supporting information 3** Clone library obtained from bacterial 16S rRNA gene amplicons. Length and accession numbers of the partial sequences, their taxonomic affiliation as well as the experimental and calculated T-RF lengths of the respective clones obtained by *MspI* restriction are presented. BLASTn search was done against the NCBI database excluding environmental sequences. Taxonomic assignment is based on the RDP Classifier with 80% confidence threshold.

| Clone              | Sequence length (bp) | Acc. No. | Highest BLAST hit (Acc. no.) / Sequence identity                            | RDP Classifier                   | <i>MspI</i> T-RF (bp) calculated/experimental |
|--------------------|----------------------|----------|-----------------------------------------------------------------------------|----------------------------------|-----------------------------------------------|
| 8.13_13.11.12_B9   | 657                  | KT456558 | <i>Lactobacillus</i> sp. IWT8 (AB894863) / 99 %                             | <i>Lactobacillus</i>             | 142/139                                       |
| 8.15_4.6.13_D3     | 703                  | KT456559 | <i>Lactobacillus</i> sp. JCM 8674 (AB911515) / 96%                          | <i>Lactobacillus</i>             | 178/175                                       |
| 8.15_14.6.13_B12   | 684                  | KT456560 | <i>Lactobacillus amylolyticus</i> (Y17361) / 94%                            | <i>Lactobacillus</i>             | 180/178                                       |
| 8.12S_18.12.12_D1  | 758                  | KT456561 | <i>Lactobacillus amylovorus</i> GRL1118 (CP002609) / 95%                    | <i>Lactobacillus</i>             | 180/178                                       |
| 8.12S_1.12.12_F6   | 667                  | KT456562 | <i>Lactobacillus perolens</i> strain JCM 8647 (AB690232) / 94%              | <i>Lactobacillus</i>             | 215/214                                       |
| 8.12S_1.12.12_C1   | 753                  | KT456563 | <i>Lactobacillus vini</i> (AY681131) / 96%                                  | <i>Lactobacillus</i>             | 562/563                                       |
| 8.12S_1.12.12_F7   | 681                  | KT456564 | <i>Lactobacillus vini</i> (NR_042196) / 99%                                 | <i>Lactobacillus</i>             | 562/563                                       |
| 8.12S_1.12.12_E9   | 627                  | KT456565 | <i>Lactobacillus porcinae</i> strain R-42633 (NR_108876) / 96%              | <i>Lactobacillus</i>             | 567/567                                       |
| 8.17_8.6.13_A2     | 597                  | KT456566 | <i>Lactobacillaceae</i> bacterium DJF_003 (EU728746) /96%                   | <i>Lactobacillus</i>             | 566/570                                       |
| 8.12S_18.12.12_C5  | 706                  | KT456567 | <i>Lactobacillus silagei</i> strain IWT126 (NR_114388) / 99%                | <i>Lactobacillus</i>             | 571/573                                       |
| 8.12S_1.12.12_C8   | 634                  | KT456568 | <i>Lactobacillus porcinae</i> strain R-42633 (NR_108876) / 98%              | <i>Lactobacillus</i>             | 571/574                                       |
| 8.15_4.6.13_A1     | 564                  | KT456569 | <i>Lactobacillus coleohominis</i> (AB911496) / 98%                          | <i>Lactobacillus</i>             | 580/577                                       |
| 8.12S+8.13+8.15_B3 | 585                  | KT456570 | <i>Lactobacillus camelliae</i> strain FQ060 (KF418823) / 99%                | <i>Lactobacillus</i>             | 576/579                                       |
| 8.13_13.11.12_A3   | 714                  | KT456571 | <i>Lactobacillus panis</i> strain GH1 (KP216208) / 99 %                     | <i>Lactobacillus</i>             | 579/580                                       |
| 8.15_4.6.13_D9     | 771                  | KT456572 | <i>Lactobacillus pontis</i> strain M17-5 (KF030785) / 99%                   | <i>Lactobacillus</i>             | 580/580                                       |
| 8.12S_1.12.12_D6   | 645                  | KT456573 | <i>Lactobacillus</i> sp. SW201 (JQ809688)/ 97%                              | <i>Lactobacillus</i>             | 580/582                                       |
| 8.15_4.6.13_F1     | 696                  | KT456574 | <i>Lactobacillus buchneri</i> CD034 (CP003043) / 99%                        | <i>Lactobacillus</i>             | 581/582                                       |
| 8.12S_1.12.12_H7   | 699                  | KT456575 | <i>Clostridium</i> sp. ZGM211 (KT000268) / 99%                              | <i>Clostridium sensu stricto</i> | 508/506                                       |
| 8.12S_1.12.12_D5   | 772                  | KT456576 | <i>Clostridium</i> sp. MB9-9 (KJ001789) / 100%                              | <i>Clostridium sensu stricto</i> | 518/516                                       |
| 8.15+8.17+8.12S_D7 | 709                  | KT456577 | <i>Clostridium tyrobutyricum</i> 5S (L08062) / 99%                          | <i>Clostridium sensu stricto</i> | 518/517                                       |
| 8.12S_18.12.12_F3  | 510                  | KT456578 | <i>Clostridium butyricum</i> (LC037212) / 99%                               | <i>Clostridium sensu stricto</i> | 519/519                                       |
| 8.12S_1.12.12_E11  | 588                  | KT456579 | <i>Clostridium</i> sp. L15 (AY337519) / 96%                                 | <i>Clostridium sensu stricto</i> | 524/521                                       |
| 8.12S_1.12.12_D12  | 691                  | KT456580 | <i>Clostridium</i> sp. MSTE9 (JN091083) / 93%                               | <i>Clostridium IV</i>            | 281/276                                       |
| 8.12S_18.12.12_F5  | 554                  | KT456581 | <i>Clostridiales</i> bacterium oral taxon F32 strain VO026 (HM099644) / 90% | <i>Clostridiales</i>             | 322/323                                       |

|                     |     |          |                                                                                   |                          |         |
|---------------------|-----|----------|-----------------------------------------------------------------------------------|--------------------------|---------|
| 8.12S_18.12.12_G7   | 651 | KT456582 | <i>Clostridiales</i> bacterium canine oral taxon 123 clone OJ033 (JN713290) / 82% | <i>Clostridiales</i>     | 480/483 |
| 8.17_26.6.13_B4     | 661 | KT456583 | <i>Clostridium</i> sp. strain S6 (AY949858) /90%                                  | <i>Ruminococcaceae</i>   | 69/62   |
| 8.17_26.6.13_C3     | 638 | KT456584 | <i>Clostridium</i> sp. strain S6 (AY949858) / 93%                                 | <i>Ruminococcaceae</i>   | 76/69   |
| 8.17_26.6.13_A12    | 559 | KT456585 | <i>Clostridium</i> sp. strain S6 (AY949858) /93%                                  | <i>Ruminococcaceae</i>   | 149/145 |
| 8.15+8.17+8.12S_C9  | 516 | KT456586 | Bacterium NLAE-zl-C147 (JQ607885) /99%                                            | <i>Ruminococcaceae</i>   | 281/280 |
| 8.17_26.6.13_A10    | 625 | KT456587 | <i>Clostridium</i> sp. strain Z6 (AY949859) /93%                                  | <i>Ruminococcaceae</i>   | 287/286 |
| 8.15+8.17+8.12S_A6  | 687 | KT456588 | <i>Clostridium</i> sp. MSTE9 (JN091083) /96%                                      | <i>Ruminococcaceae</i>   | 383/372 |
| 8.15+8.17+8.12S_E4  | 719 | KT456589 | <i>Lachnospiraceae</i> bacterium 19gly4 (AF550610) /89%                           | <i>Ruminococcaceae</i>   | 285/284 |
| 8.17_26.6.13_C2     | 500 | KT456590 | <i>Clostridium</i> sp. MF18_Ns (HF675163) / 94%                                   | <i>Lachnospiraceae</i>   | 159/157 |
| 8.15+8.17+8.12S_D2  | 644 | KT456591 | <i>Lachnospiraceae</i> bacterium A4 (DQ789118) /94%                               | <i>Lachnospiraceae</i>   | 210/209 |
| 8.12S+8.13+8.15_H2  | 727 | KT456592 | <i>Clostridiales</i> bacterium P3M-3 (KF931641) / 95%                             | <i>Lachnospiraceae</i>   | 296/296 |
| 8.12S_18.12.12_A10  | 657 | KT456593 | <i>Clostridium herbivorans</i> strain 54408 (NR_118669) / 95%                     | <i>Lachnospiraceae</i>   | 486/488 |
| 8.17_8.6.13_E6      | 632 | KT456594 | <i>Alicyclobacillus acidoterrestris</i> strain DSM 3922 (NR_118645) /83%          | <i>Firmicutes</i>        | 204/202 |
| 8.15_14.6.13_A12    | 651 | KT456595 | <i>Megasphaera</i> sp. BLPYG-07 (HM990964) / 99%                                  | <i>Megasphaera</i>       | 300/297 |
| 8.15_14.6.13_G9     | 557 | KT456596 | <i>Megasphaera elsdenii</i> (AB298908) / 99%                                      | <i>Megasphaera</i>       | 300/298 |
| 8.15+8.17+8.12S_C8  | 683 | KT456597 | <i>Acetobacter syzygii</i> strain G4-4 (HM217935) /99%                            | <i>Acetobacter</i>       | 440/440 |
| 8.15_25.6.13_H9     | 683 | KT456598 | <i>Acetobacter pasteurianus</i> strain G3-12 (KF030748) /99%                      | <i>Acetobacter</i>       | 550/552 |
| 8.15+8.17+8.12S_C4  | 660 | KT456599 | Bacterium O61128-OL-KR37-AA 3-0 10000x -1A (FJ037613) /92%                        | <i>Acetobacteraceae</i>  | 90/84   |
| 8.17_8.6.13_H4      | 490 | KT456600 | <i>Bacillus oleronius</i> strain ATCC 700005 (NR_043325) /99%                     | <i>Bacillus</i>          | 146/142 |
| 8.15_14.6.13_A11    | 488 | KT456601 | <i>Bacillus</i> sp. KZ_AalM_Mm2 (GU726177) / 99%                                  | <i>Bacillus</i>          | 153/147 |
| 8.15_14.+25.6.13_E8 | 555 | KT456602 | <i>Bacillus</i> sp. BO7 (KJ741217) / 100%                                         | <i>Bacillus</i>          | 168/166 |
| 8.12S+8.13+8.15_G3  | 641 | KT456603 | <i>Bacteroides nordii</i> strain JCM 12987 (NR_112939) / 86 %                     | <i>Bacteroidales</i>     | 85/78   |
| 8.17_26.6.13_B8     | 731 | KT456604 | <i>Bacteroides heparinolyticus</i> strain SEQ218 (JN867293) /84%                  | <i>Bacteroidales</i>     | 361/362 |
| 8.15+8.17+8.12S_C1  | 628 | KT456605 | <i>Lutibacter aestuarii</i> strain MA-My1 (NR_108995) /84%                        | <i>Bacteroidetes</i>     | 208/206 |
| 8.15_14.6.13_H6     | 605 | KT456606 | <i>Coriobacteriaceae</i> bacterium 68-1-3 (CP009302) / 93%                        | <i>Coriobacteriaceae</i> | 67/60   |
| 8.17_26.6.13_H12    | 654 | KT456607 | <i>Coriobacteriaceae</i> bacterium SNR48-350 (AB752502) / 94%                     | <i>Coriobacteriaceae</i> | 131/125 |
| 8.15_4.6.13_A8      | 747 | KT456608 | <i>Paenibacillus</i> sp. AHK180-5 (AB306508) / 99%                                | <i>Paenibacillus</i>     | 137/131 |
| 8.15_25.6.13_E12    | 566 | KT456609 | <i>Paenibacillus lactis</i> strain SCTB114 (JN650279) / 99%                       | <i>Paenibacillus</i>     | 149/143 |
| 8.15_14.6.13_E1     | 629 | KT456610 | <i>Prevotella oulorum</i> strain F0390 (GU470906) / 88%                           | <i>Prevotella</i>        | 97/87   |
| 8.15_25.6.13_G2     | 421 | KT456611 | <i>Prevotella oulorum</i> strain F0390 (GU470906) /88%                            | <i>Prevotellaceae</i>    | 97/90   |

|                      |     |          |                                                                     |                         |         |
|----------------------|-----|----------|---------------------------------------------------------------------|-------------------------|---------|
| 8.15_14.6.13_F2      | 659 | KT456612 | <i>Olsenella</i> sp. SK9K4 (JX905358) / 99%                         | <i>Olsenella</i>        | 62/54   |
| 8.17_26.6.13_G10     | 556 | KT456613 | <i>Stenotrophomonas</i> sp. BCBo8 (EU140962) / 99%                  | <i>Stenotrophomonas</i> | 83/74   |
| 8.15_4.6.13_D12      | 712 | KT456614 | <i>Petrimonas</i> sp. ING2-E5A (KP233808) / 99%                     | <i>Petrimonas</i>       | 93/88   |
| 8.15_14.+25.6.13_E11 | 671 | KT456615 | <i>Rummeliibacillus pycnus</i> strain SCTB112 (JN650277) / 99%      | <i>Rummeliibacillus</i> | 152/149 |
| 8.15+8.17+8.12S_H7   | 615 | KT456616 | <i>Corynebacterium</i> sp. BBDP55 (DQ337519) /99%                   | <i>Corynebacterium</i>  | 162/159 |
| 8.15_14.+25.6.13_H11 | 674 | KT456617 | <i>Ureibacillus thermosphaericus</i> (AB300774) / 99%               | <i>Ureibacillus</i>     | 167/164 |
| 8.15_25.6.13_B1      | 661 | KT456618 | <i>Pseudoclavibacter caeni</i> strain MJ28 (NR_109073) / 99%        | <i>Micrococcineae</i>   | 281/282 |
| 8.15_14.6.13_H1      | 601 | KT456619 | <i>Dialister succinatiphilus</i> strain YIT 11850 (NR_041666) / 94% | <i>Veillonellaceae</i>  | 304/303 |
| 8.15_4.6.13_B4       | 694 | KT456620 | <i>Kerstersia gyiorum</i> strain HF2 (HM117848) / 99%               | <i>Kerstersia</i>       | 448/447 |
| 8.15_4.6.13_D11      | 679 | KT456621 | <i>Acidovorax</i> sp. 98-63833 (AY258065) / 99%                     | <i>Comamonas</i>        | 489/490 |

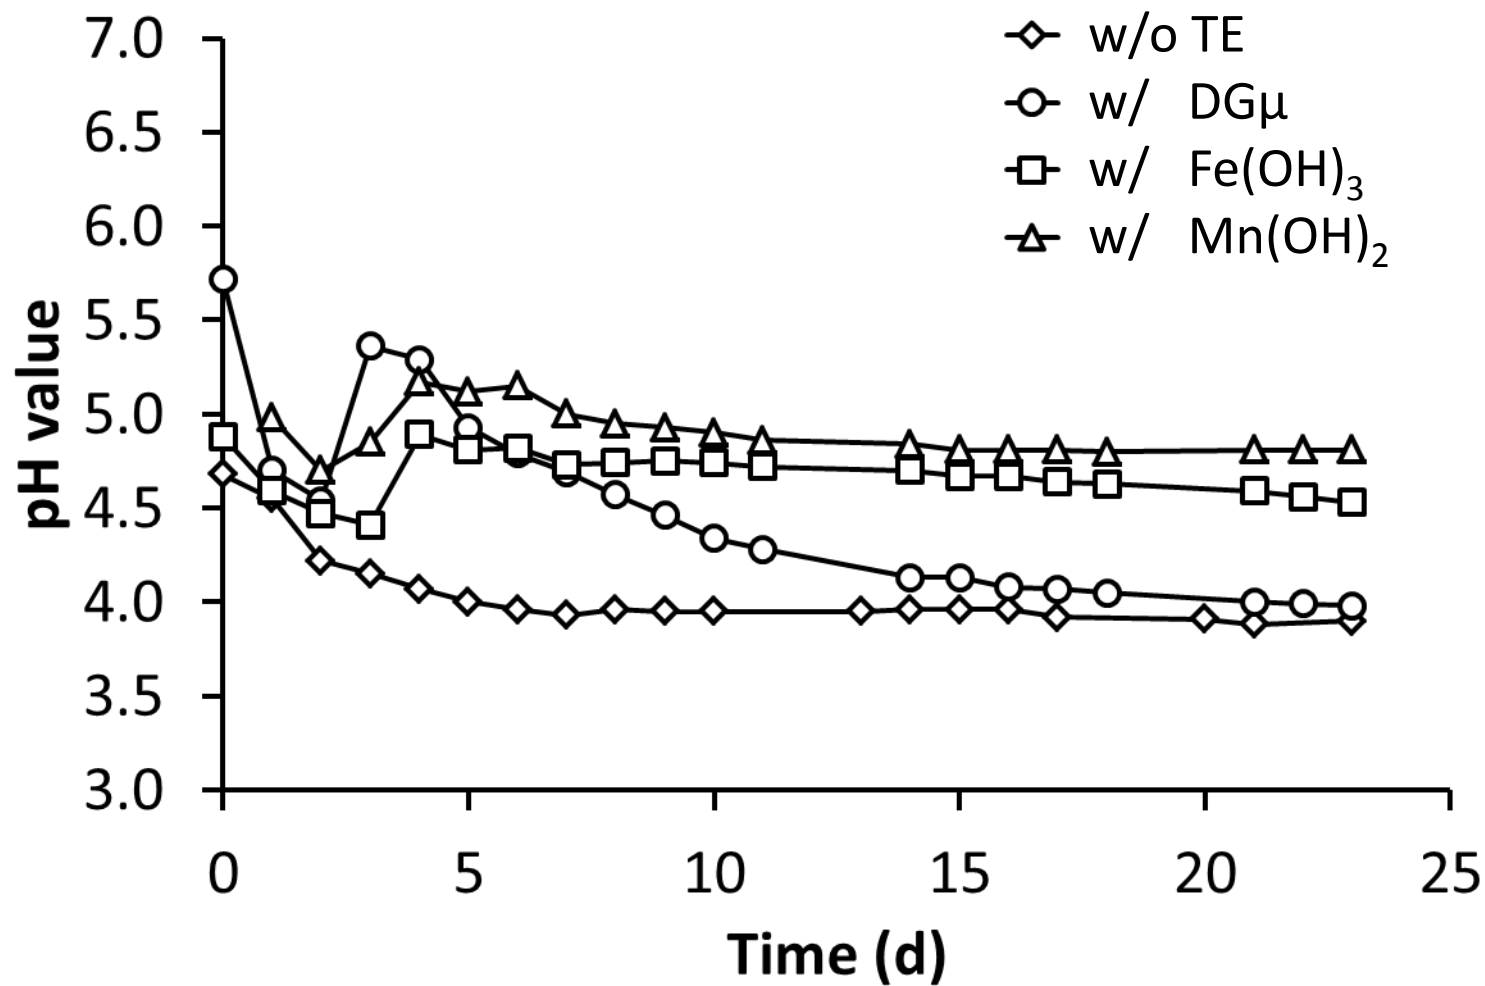

**Supporting information 4** Development of the pH values in the replicate experiments.

**Supporting information 5** Extended Weende forage analysis of maize silage before and after anaerobic fermentation without trace element supplementation (w/o TE) and with addition of DGμ (w/ DGμ). Conversion degrees were calculated for the single compounds. Mean values of the replicate experiments and the range are indicated. TS total solids, VS volatile solids.

| Sample                                     | Fresh mass |                | TS  |                       | VS     |     | Crude ash<br>(g kg <sup>-1</sup> TS <sup>-1</sup> ) | Crude protein         |                                        |     | Crude fat             |                                        |     | Nitrogen free extractives |                                        |     | Cellulose             |                                        |     | Hemicellulose         |                                        |     |                       |
|--------------------------------------------|------------|----------------|-----|-----------------------|--------|-----|-----------------------------------------------------|-----------------------|----------------------------------------|-----|-----------------------|----------------------------------------|-----|---------------------------|----------------------------------------|-----|-----------------------|----------------------------------------|-----|-----------------------|----------------------------------------|-----|-----------------------|
|                                            | (g)        | (% fresh mass) | (g) | Conversion degree (%) | (% TS) | (g) |                                                     | Conversion degree (%) | (g kg <sup>-1</sup> TS <sup>-1</sup> ) | (g) | Conversion degree (%) | (g kg <sup>-1</sup> TS <sup>-1</sup> ) | (g) | Conversion degree (%)     | (g kg <sup>-1</sup> TS <sup>-1</sup> ) | (g) | Conversion degree (%) | (g kg <sup>-1</sup> TS <sup>-1</sup> ) | (g) | Conversion degree (%) | (g kg <sup>-1</sup> TS <sup>-1</sup> ) | (g) | Conversion degree (%) |
| Maize silage                               | 2000       | 35.4           | 707 |                       | 95.4   | 675 |                                                     | 45.7                  | 94.1                                   | 67  |                       | 12.3                                   | 9   |                           | 649.8                                  | 459 |                       | 194.4                                  | 137 |                       | 368.8                                  | 261 |                       |
| Solid digestate main experiment w/o TE     | 2515       | 20.6           | 517 | 25 ± 1.7              | 96.0   | 496 | 25 ± 1.6                                            | 40.5                  | 75.5                                   | 39  | 39 ± 2.1              | 12.4                                   | 6   | 23 ± 3.0                  | 625.4                                  | 323 | 27 ± 2.6              | 243.8                                  | 126 | 8 ± 0.7               | 349                                    | 181 | 37 ± 6.6              |
| Solid digestate parallel experiment w/o TE | 2503       | 21.6           | 541 |                       | 95.6   | 518 |                                                     | 43.7                  | 77.2                                   | 42  |                       | 12.8                                   | 7   |                           | 641.1                                  | 347 |                       | 236.6                                  | 128 |                       | 269.7                                  | 146 |                       |
| Solid digestate main experiment w/ DGμ     | 2416       | 18.6           | 449 | 35 ± 1.5              | 93.8   | 421 | 36 ± 1.7                                            | 62.3                  | 88.4                                   | 40  | 38 ± 2.6              | 12.2                                   | 5   | 63 ± 26.4                 | 589.6                                  | 265 | 39 ± 3.6              | 258.8                                  | 116 | 13 ± 2.9              | 251.6                                  | 113 | 54 ± 2.9              |
| Solid digestate parallel experiment w/ DGμ | 2619       | 18.0           | 471 |                       | 94.4   | 444 |                                                     | 56                    | 91.6                                   | 43  |                       | 1.9                                    | 1   |                           | 631.8                                  | 297 |                       | 263.7                                  | 124 |                       | 272                                    | 128 |                       |



**Supporting information 6** Ammonia nitrogen content ( $\text{NH}_4^+\text{-N}$ ) during the anaerobic fermentation of maize silage without TE addition, with  $\text{DG}\mu$ , with  $\text{Fe}(\text{OH})_3$ , and with  $\text{Mn}(\text{OH})_2$ . Averages were calculated from values of all experiments (including the replicate experiments). The differences of average values from minimum and maximum are indicated in parentheses.

| Experiment                  | $\text{NH}_4^+\text{-N}$ ( $\text{g L}^{-1}$ ) |                     |
|-----------------------------|------------------------------------------------|---------------------|
|                             | Start                                          | End                 |
| w/o TE                      | 0.37 ( $\pm 0.08$ )                            | 0.43 ( $\pm 0.00$ ) |
| w/ $\text{DG}\mu$           | 0.36 ( $\pm 0.01$ )                            | 0.49 ( $\pm 0.03$ ) |
| w/ $\text{Fe}(\text{OH})_3$ | 0.25 ( $\pm 0.02$ )                            | 0.43 ( $\pm 0.06$ ) |
| w/ $\text{Mn}(\text{OH})_2$ | 0.27 ( $\pm 0.00$ )                            | 0.49 ( $\pm 0.01$ ) |

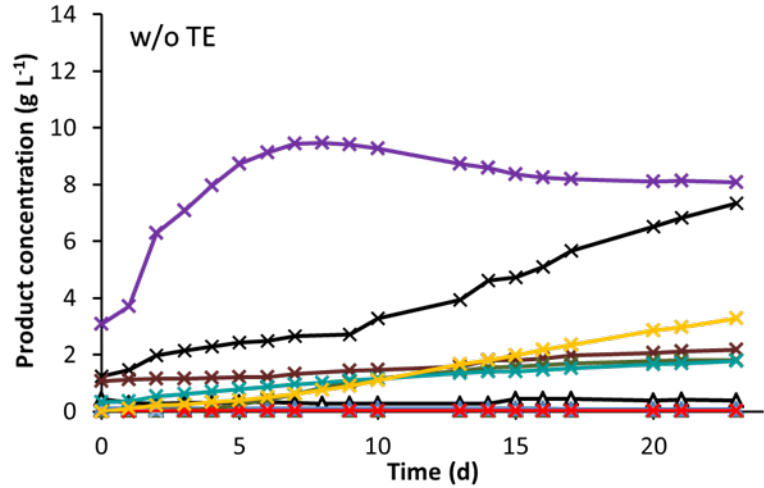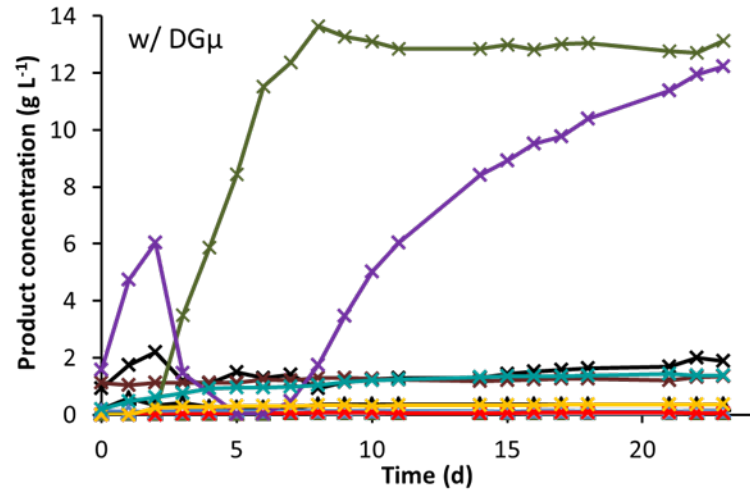

- ✕ Acetic acid
- ✕ Propionic acid
- ✕ *n*-Butyric acid
- ✕ *n*-Valeric acid
- ✕ *n*-Caproic acid
- ✕ Lactic acid
- ✕ *iso*-Valeric acid
- ✕ *iso*-Butyric acid
- ✕ Ethanol
- ✕ 1-Propanol
- ✕ 1,2-Propanediol

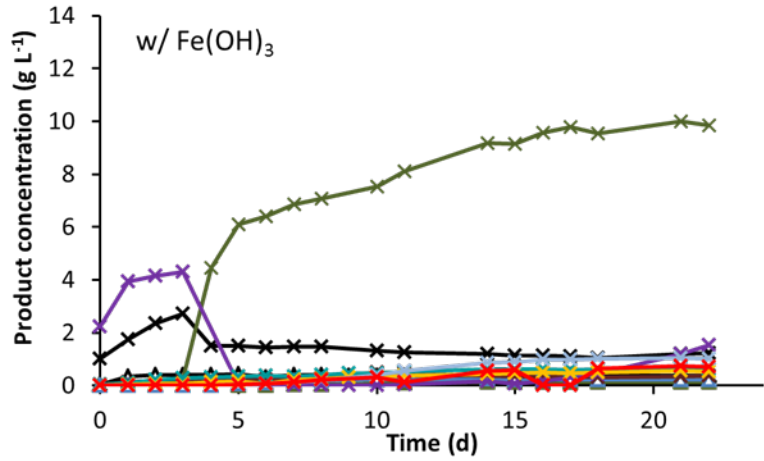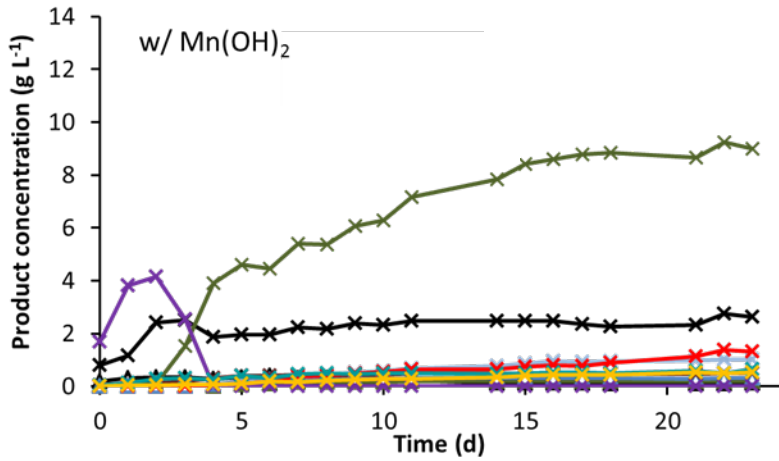

**Supporting information 7** Concentrations of organic acids and alcohols in the anaerobic fermentation of maize silage without TE additions (w/o TE), with DGμ (w/ DGμ), with Fe(OH)<sub>3</sub> (w/ Fe(OH)<sub>3</sub>), and with Mn(OH)<sub>2</sub> (w/ Mn(OH)<sub>2</sub>) in the replicate experiments.

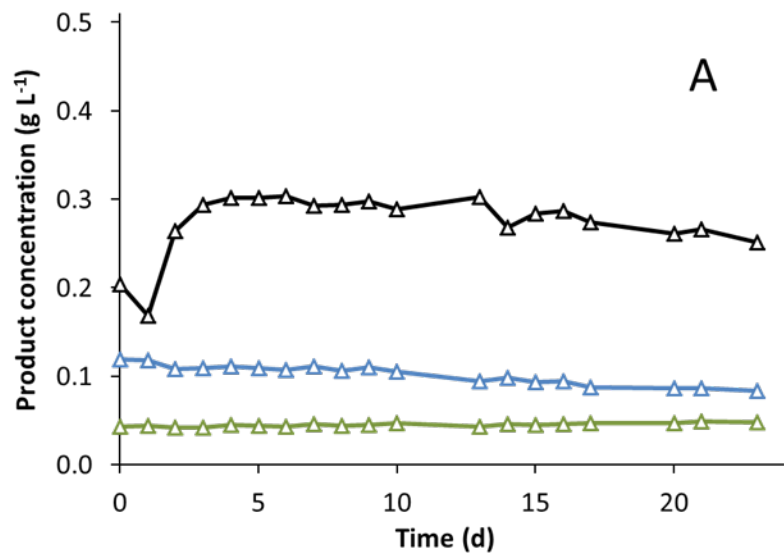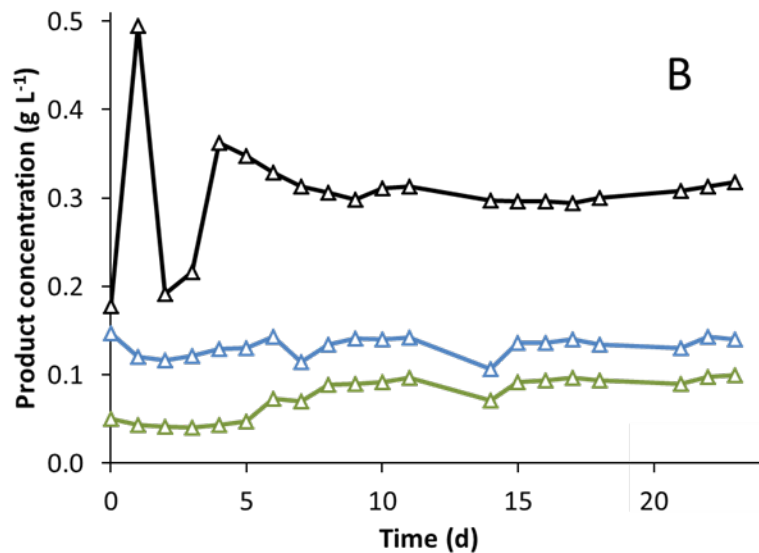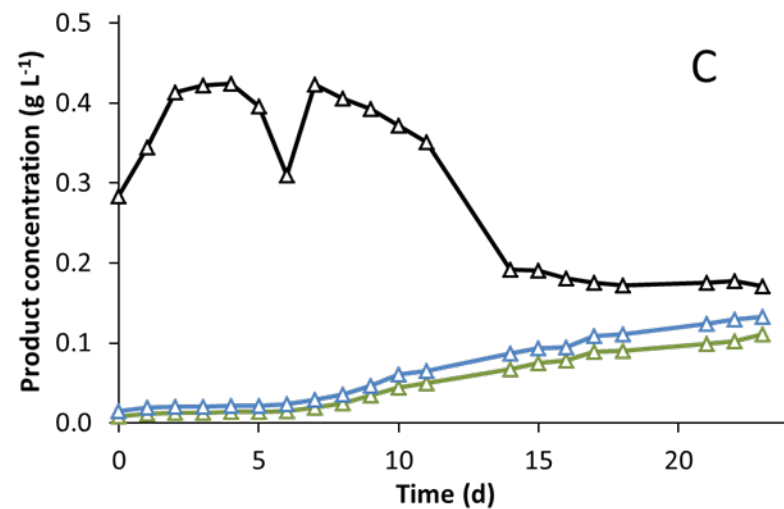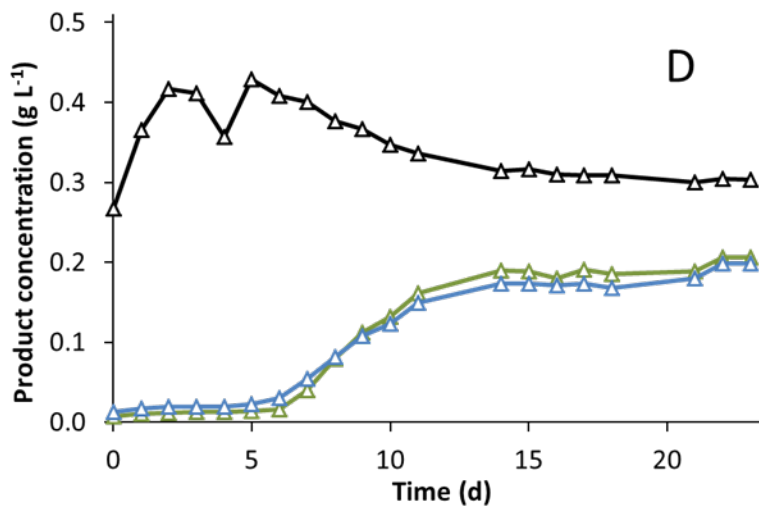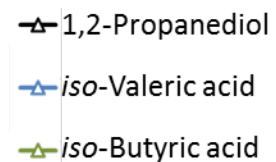

**Supporting information 8** Concentrations of *iso*-valeric and *iso*-butyric acid as well as 1,2-propanediol in the anaerobic fermentation of maize silage without TE additions (A), with DGμ (B), with Fe(OH)<sub>3</sub> (C), and with Mn(OH)<sub>2</sub> (D).

|                        |                                  | H <sub>2</sub> | O <sub>2</sub> | N <sub>2</sub> | CH <sub>4</sub> | CO <sub>2</sub> |
|------------------------|----------------------------------|----------------|----------------|----------------|-----------------|-----------------|
|                        |                                  | in %           |                |                |                 |                 |
| w/o TE                 | experiment (end)                 | 1.5 (± 0.1)    | 2.5 (± 0.5)    | 61.5 (± 0.2)   | 0.0 (± 0.0)     | 34.5 (± 0.2)    |
|                        | replicate experiment (end)       | 4.3 (± 0.1)    | 1.0 (± 0.4)    | 48.0 (± 1.2)   | 0.0 (± 0.0)     | 46.7 (± 1.5)    |
| w/ DGμ                 | experiment (days 9-10)           | 7.9 (± 0.3)    | 2.1 (± 0.2)    | 33.9 (± 0.4)   | 0.0 (± 0.0)     | 56.0 (± 0.1)    |
|                        | experiment (end)                 | 3.7 (± 1.0)    | 12.6 (± 1.8)   | 65.4 (± 3.1)   | 0.0 (± 0.0)     | 18.3 (± 3.8)    |
|                        | replicate experiment (days 9-10) | 8.5 (± 0.5)    | 2.3 (± 0.5)    | 32.5 (± 2.2)   | 0.0 (± 0.0)     | 56.7 (± 2.3)    |
|                        | replicate experiment (end)       | 2.1 (± 1.7)    | 13.0 (± 2.1)   | 59.9 (± 2.1)   | 0.0 (± 0.0)     | 25.1 (± 2.4)    |
| w/ Fe(OH) <sub>3</sub> | experiment (end)                 | 11.7 (± 0.3)   | 4.1 (± 1.7)    | 43.5 (± 5.9)   | 0.0 (± 0.0)     | 40.6 (± 7.3)    |
|                        | replicate experiment (end)       | 4.1 (± 3.0)    | 12.7 (± 4.8)   | 68.1 (± 8.4)   | 0.0 (± 0.0)     | 15.1 (± 10.3)   |
| w/ Mn(OH) <sub>2</sub> | experiment (end)                 | 6.1 (± 0.2)    | 4.7 (± 1.7)    | 38.8 (± 0.8)   | 0.0 (± 0.0)     | 50.4 (± 2.8)    |
|                        | replicate experiment (end)       | 6.3 (± 1.2)    | 4.3 (± 1.5)    | 53.5 (± 4.5)   | 0.0 (± 0.0)     | 35.9 (± 4.8)    |

**Supporting information 9** Gas composition in the last two or three days of anaerobic fermentation of maize silage without TE additions (w/o TE), with DGμ (w/ DGμ), with Fe(OH)<sub>3</sub> (w/ Fe(OH)<sub>3</sub>), and with Mn(OH)<sub>2</sub> (w/Mn(OH)<sub>2</sub>). For the experiments with DGμ, additionally values for the days 9-10 are shown. Mean values (± the range) are indicated.

**Supporting information 10** Correlation analysis (Spearman's rank correlation coefficient,  $p < 0.05$ ) of lactic acid bacteria (LAB) and other bacteria (upper table) as well as of clostridia/*Megasphaera* and LAB (lower table). For the correlation analyses, only T-RF with phylogenetic affiliation were considered. Only correlation coefficients equal or higher than 0.40 or equal or lower than -0.40 are shown. Purple color indicates LAB T-RF with high abundance, while green color indicates clostridial/*Megasphaera* T-RF with high abundance.

| Lactic acid bacteria |                          | Other bacteria |                          | Correlation coefficients |          |
|----------------------|--------------------------|----------------|--------------------------|--------------------------|----------|
| T-RF                 | Phylogenetic affiliation | T-RF           | Phylogenetic affiliation | Positive                 | Negative |
| 175                  | <i>Lactobacillus</i>     | 286            | <i>Ruminococcaceae</i>   | 0.61                     |          |
|                      |                          | 297            | <i>Megasphaera</i>       | 0.40                     |          |
|                      |                          | 298            | <i>Megasphaera</i>       | 0.55                     |          |
|                      |                          | 303            | <i>Veillonellaceae</i>   | 0.46                     |          |
| 178                  | <i>Lactobacillus</i>     | 516            | <i>Clostridium s.s.</i>  |                          | -0.57    |
| 214                  | <i>Lactobacillus</i>     | 157            | <i>Lachnospiraceae</i>   | 0.82                     |          |
| 563                  | <i>Lactobacillus</i>     | 506            | <i>Clostridium s.s.</i>  | 0.58                     |          |
| 573                  | <i>Lactobacillus</i>     | 516            | <i>Clostridium s.s.</i>  |                          | -0.59    |
|                      |                          | 286            | <i>Ruminococcaceae</i>   |                          | -0.46    |
| 574                  | <i>Lactobacillus</i>     | 506            | <i>Clostridium s.s.</i>  | 0.51                     |          |
|                      |                          | 517            | <i>Clostridium s.s.</i>  | 0.40                     |          |
| 579                  | <i>Lactobacillus</i>     | 517            | <i>Clostridium s.s.</i>  | 0.44                     |          |
|                      |                          | 519            | <i>Clostridium s.s.</i>  | 0.45                     |          |
| 580                  | <i>Lactobacillus</i>     | 516            | <i>Clostridium s.s.</i>  |                          | -0.47    |
|                      |                          | 286            | <i>Ruminococcaceae</i>   |                          | -0.43    |
| 582                  | <i>Lactobacillus</i>     | 516            | <i>Clostridium s.s.</i>  |                          | -0.43    |
|                      |                          | 286            | <i>Ruminococcaceae</i>   |                          | -0.56    |
|                      |                          | 298            | <i>Megasphaera</i>       |                          | -0.41    |
|                      |                          | 303            | <i>Veillonellaceae</i>   |                          | -0.44    |
| 53                   | <i>Olsenella</i>         | 506            | <i>Clostridium s.s.</i>  | 0.42                     |          |
|                      |                          | 286            | <i>Ruminococcaceae</i>   |                          | -0.43    |
|                      |                          | 297            | <i>Megasphaera</i>       |                          | -0.42    |
|                      |                          | 298            | <i>Megasphaera</i>       |                          | -0.56    |
|                      |                          | 303            | <i>Veillonellaceae</i>   |                          | -0.45    |
| 60                   | <i>Coriobacteriaceae</i> | 516            | <i>Clostridium s.s.</i>  | 0.59                     |          |
|                      |                          | 517            | <i>Clostridium s.s.</i>  | 0.53                     |          |
| 125                  | <i>Coriobacteriaceae</i> | 483            | <i>Clostridiales</i>     | 0.48                     |          |
|                      |                          | 69             | <i>Ruminococcaceae</i>   | 0.61                     |          |
|                      |                          | 286            | <i>Ruminococcaceae</i>   | 0.61                     |          |
|                      |                          | 298            | <i>Megasphaera</i>       | 0.52                     |          |
|                      |                          | 303            | <i>Veillonellaceae</i>   | 0.41                     |          |

| Clostridia |                          | Lactic acid bacteria                  |                                                                                                                                              | Correlation coefficients |                                  |
|------------|--------------------------|---------------------------------------|----------------------------------------------------------------------------------------------------------------------------------------------|--------------------------|----------------------------------|
| T-RF       | Phylogenetic affiliation | T-RF                                  | Phylogenetic affiliation                                                                                                                     | Positive                 | Negative                         |
| 506        | <i>Clostridium s.s.</i>  | 563<br>574<br>53                      | <i>Lactobacillus</i><br><i>Lactobacillus</i><br><i>Olsenella</i>                                                                             | 0.58<br>0.51<br>0.42     |                                  |
| 516        | <i>Clostridium s.s.</i>  | 60<br>178<br>573<br>580<br>582        | <i>Coriobacteriaceae</i><br><i>Lactobacillus</i><br><i>Lactobacillus</i><br><i>Lactobacillus</i><br><i>Lactobacillus</i>                     | 0.59                     | -0.57<br>-0.59<br>-0.47<br>-0.43 |
| 517        | <i>Clostridium s.s.</i>  | 574<br>579<br>60                      | <i>Lactobacillus</i><br><i>Lactobacillus</i><br><i>Coriobacteriaceae</i>                                                                     | 0.40<br>0.44<br>0.53     |                                  |
| 519        | <i>Clostridium s.s.</i>  | 579                                   | <i>Lactobacillus</i>                                                                                                                         | 0.45                     |                                  |
| 69         | <i>Ruminococcaceae</i>   | 125                                   | <i>Coriobacteriaceae</i>                                                                                                                     | 0.61                     |                                  |
| 286        | <i>Ruminococcaceae</i>   | 175<br>125<br>573<br>580<br>582<br>53 | <i>Lactobacillus</i><br><i>Coriobacteriaceae</i><br><i>Lactobacillus</i><br><i>Lactobacillus</i><br><i>Lactobacillus</i><br><i>Olsenella</i> | 0.61<br>0.61             | -0.46<br>-0.43<br>-0.56<br>-0.43 |
| 157        | <i>Lachnospiraceae</i>   | 214                                   | <i>Lactobacillus</i>                                                                                                                         | 0.82                     |                                  |
| 297        | <i>Megasphaera</i>       | 175<br>53                             | <i>Lactobacillus</i><br><i>Olsenella</i>                                                                                                     | 0.40                     | -0.42                            |
| 298        | <i>Megasphaera</i>       | 175<br>125<br>582<br>53               | <i>Lactobacillus</i><br><i>Coriobacteriaceae</i><br><i>Lactobacillus</i><br><i>Olsenella</i>                                                 | 0.55<br>0.52             | -0.41<br>-0.56                   |
| 483        | <i>Clostridiales</i>     | 125                                   | <i>Coriobacteriaceae</i>                                                                                                                     | 0.48                     |                                  |
